# Supplementary material for: Retinitis pigmentosa-linked mutation in DHX38 modulates its splicing activity
Source: PubMed Central journal article supplement (PMC8985939; doi:10.1371/journal.pone.0265742), 2022-04-06

**S1 - File**  
**Raw data for Fig. 1**

Raw data for Fig. 1A

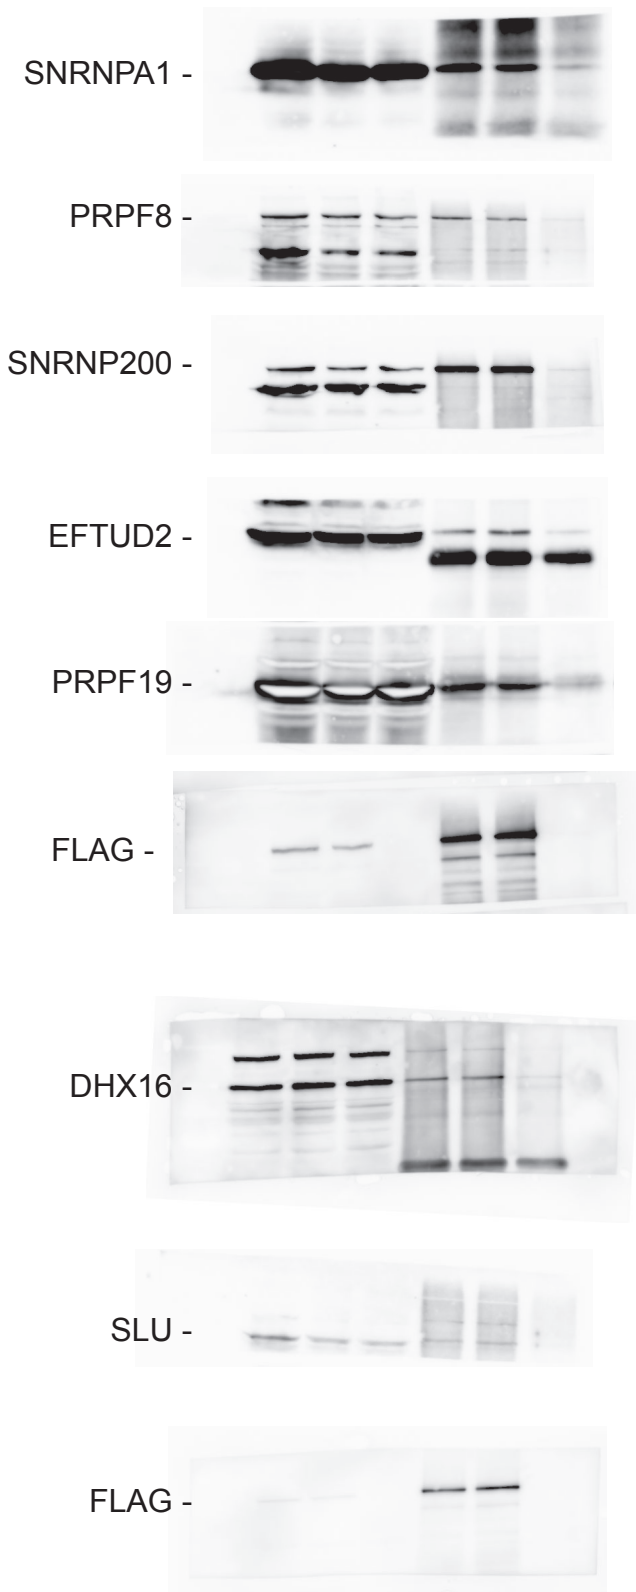

Raw data for Fig. 1B

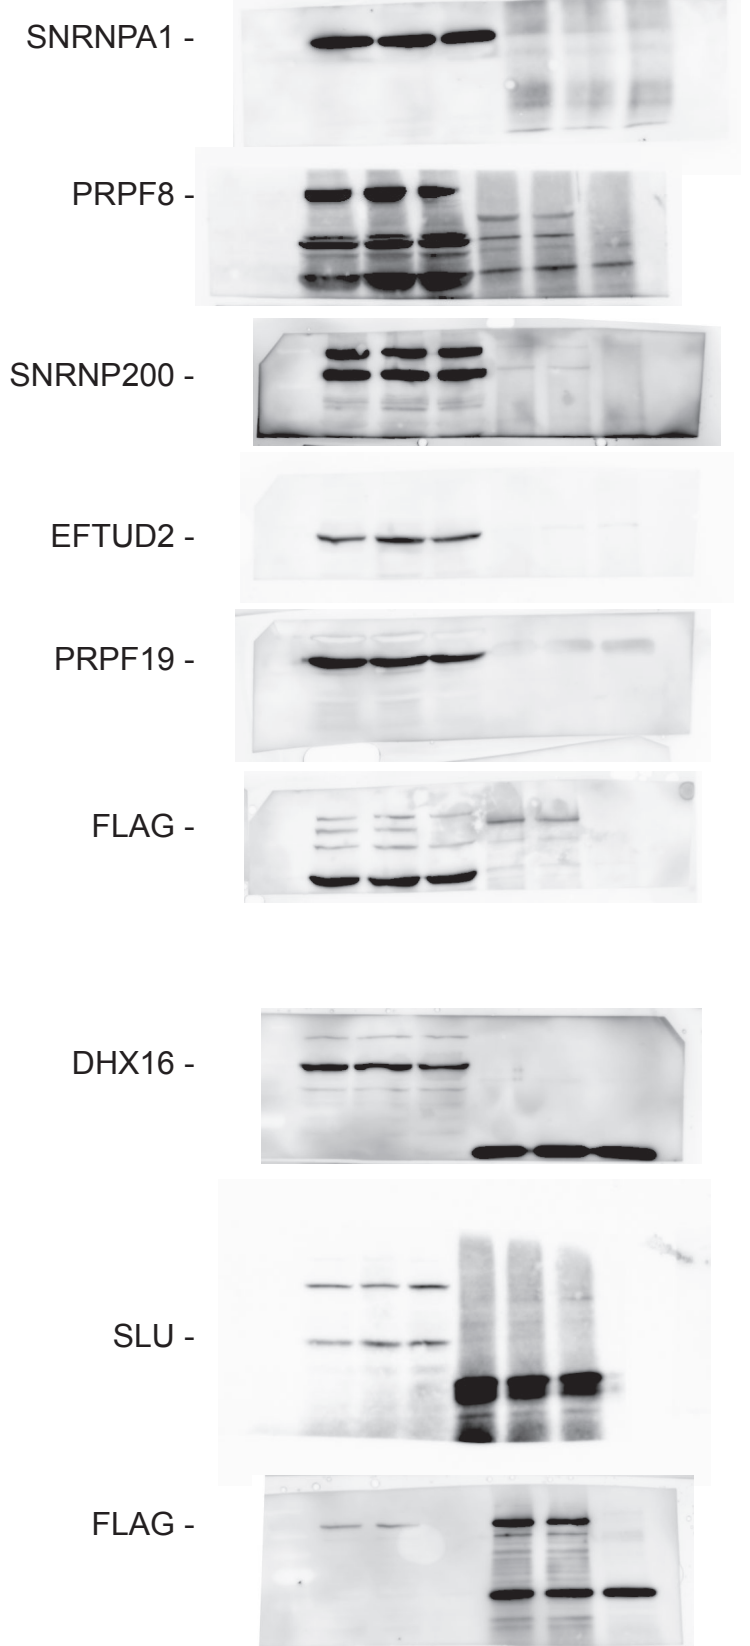

Raw images for Fig 3

Fig. 3A

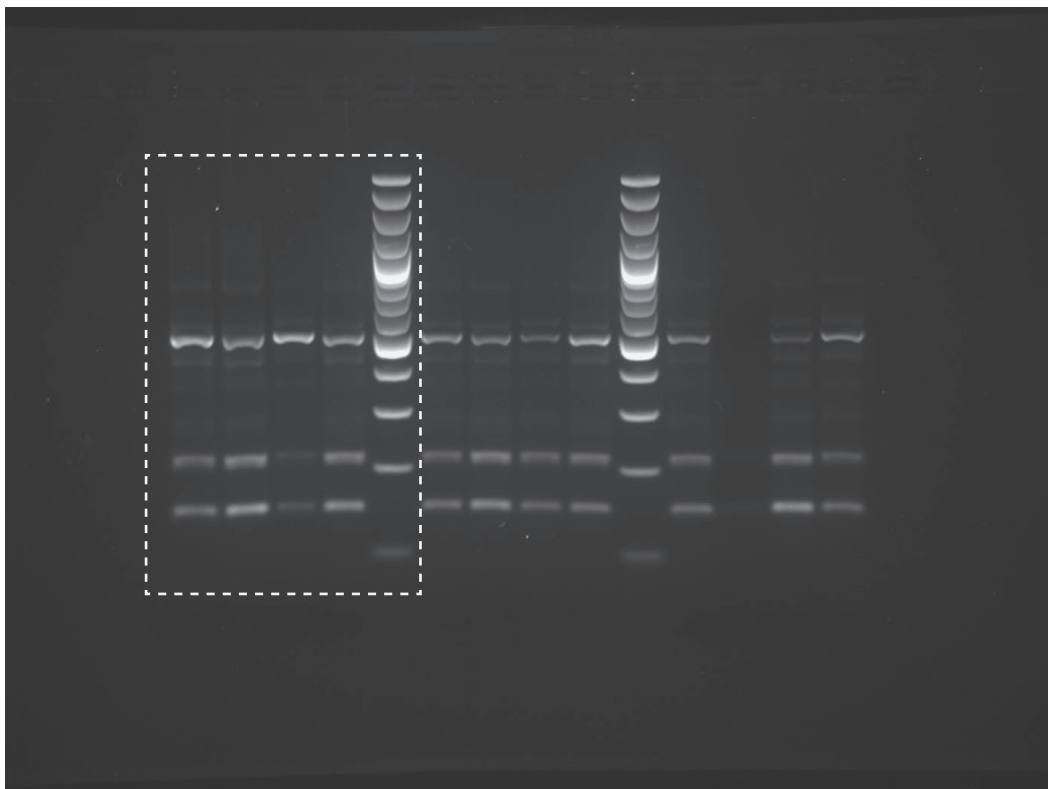

Fig. 3B

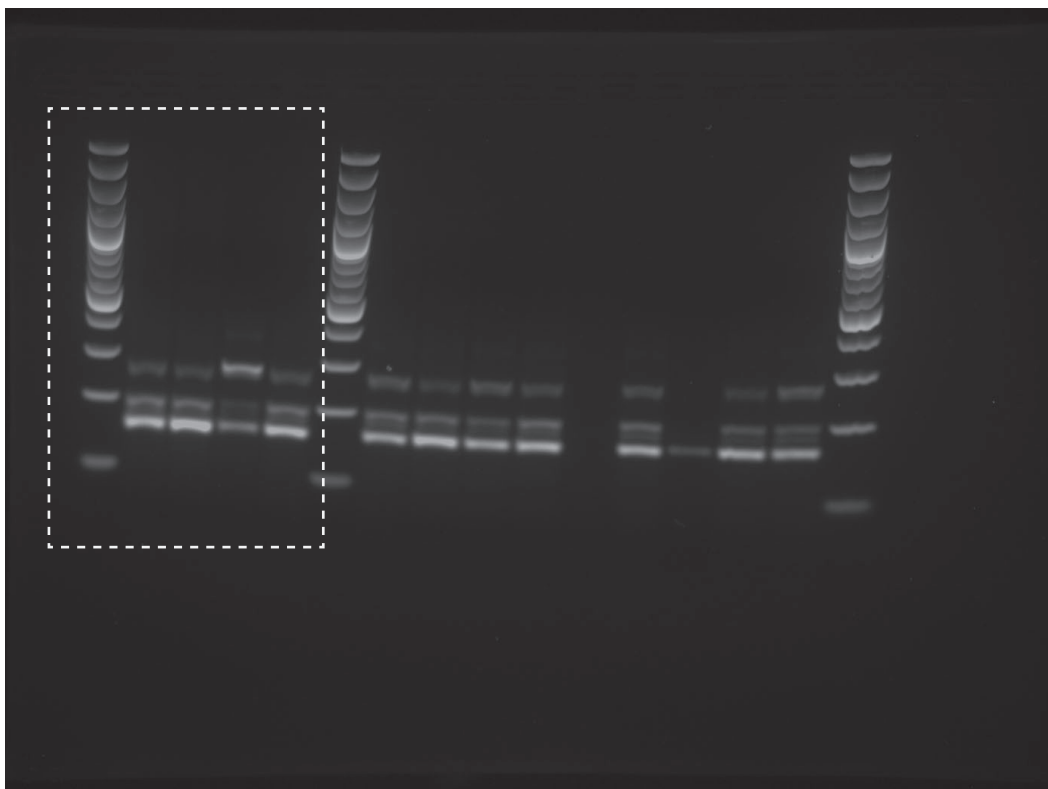

Raw image for Fig. 4A

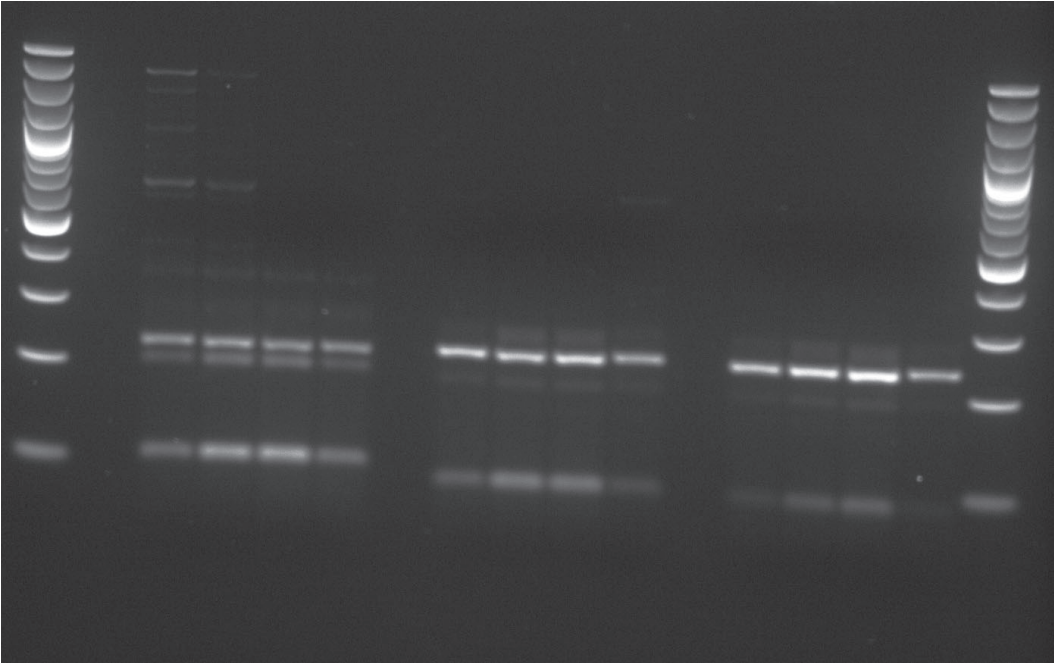

Raw images for Fig. S2C

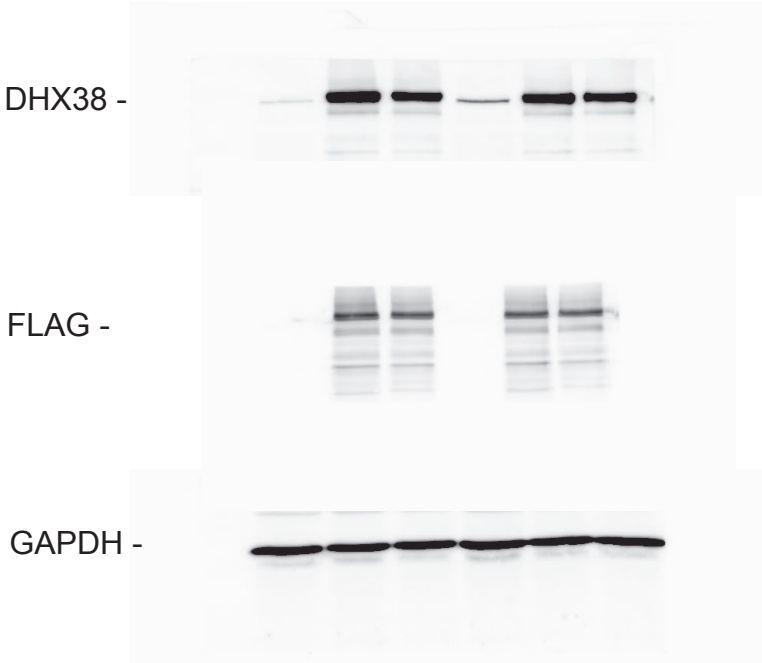

Supplement: pone.0265742.s007.pdf [file pone.0265742.s007.pdf]
